# Supplementary material for: Spin crossover in iron(ii) complexes with ferrocene-bearing triazole-pyridine ligands
Source: Royal Society of Chemistry journal article supplement (doi:10.1039/c5dt03084f), 2015-01-01

## Supporting Information

**Figure S1.** Magnetic behaviour of the unsolvated forms of **1** (left) and **2** (right). Desolvated samples were synthesised by heating respectively **1** and **2** at 420 K and 450 K for 3 h.

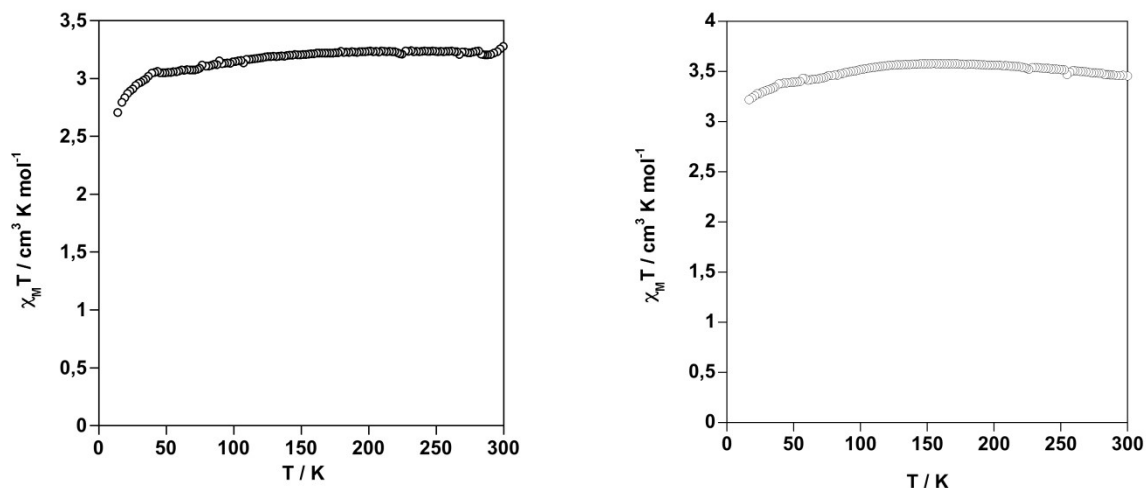

**Figure S2.** TGA plot for  $[\text{Fe}(\text{Fctzpy})_2(\text{NCS})_2] \cdot \text{CHCl}_3$  (**1**) and  $[\text{Fe}(\text{Fctzpy})_2(\text{NCSe})_2] \cdot \text{CHCl}_3$  (**2**). Dotted lines denote the limit of thermal stability (ca 400 K) of the solvated forms of **1** and **2**.

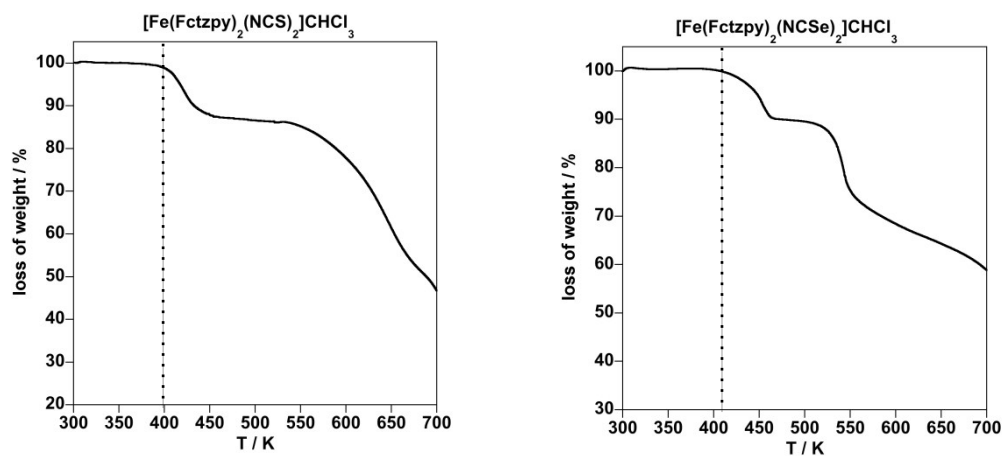

**Figure S3.** Intermolecular contacts between adjacent complex molecules. Red lines correspond to contacts smaller than 3.650 Å.

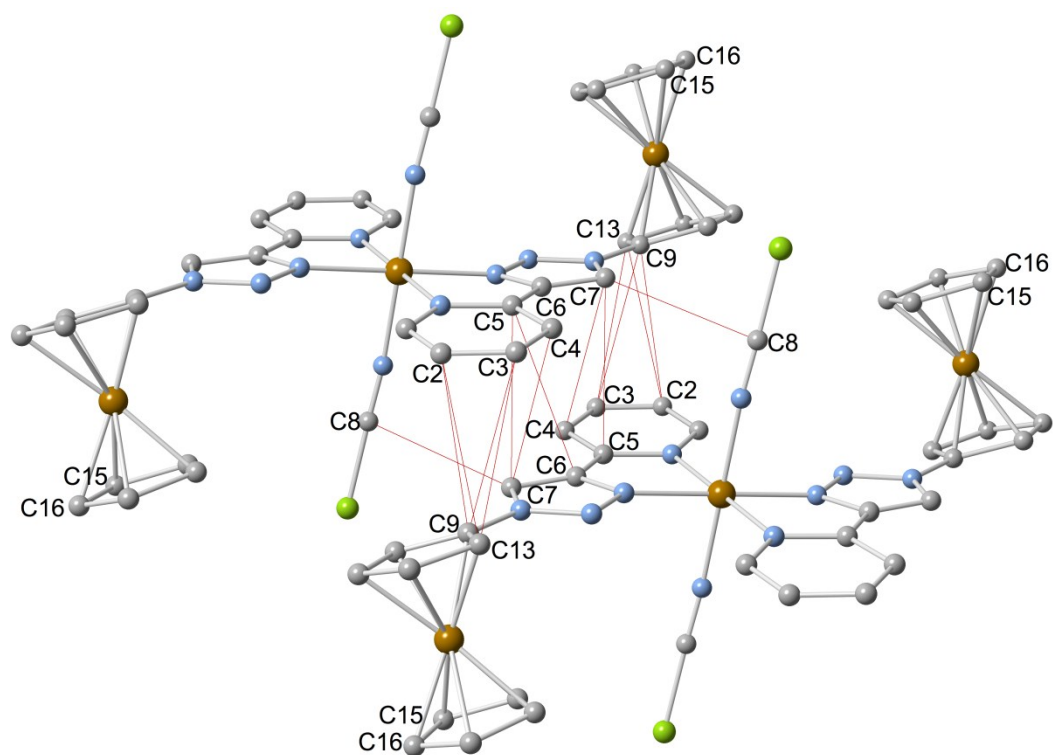

Supplement: c5dt03084f1.pdf [file c5dt03084f1.pdf]
